# Supplementary material for: Emergence of the cortical encoding of phonetic features in the first year of life
Source: PubMed Central journal article supplement (PMC10692113; doi:10.1038/s41467-023-43490-x), 2023-12-01
Supplement: 41467_2023_43490_MOESM1_ESM.pdf [file 41467_2023_43490_MOESM1_ESM.pdf]

## Supplementary information

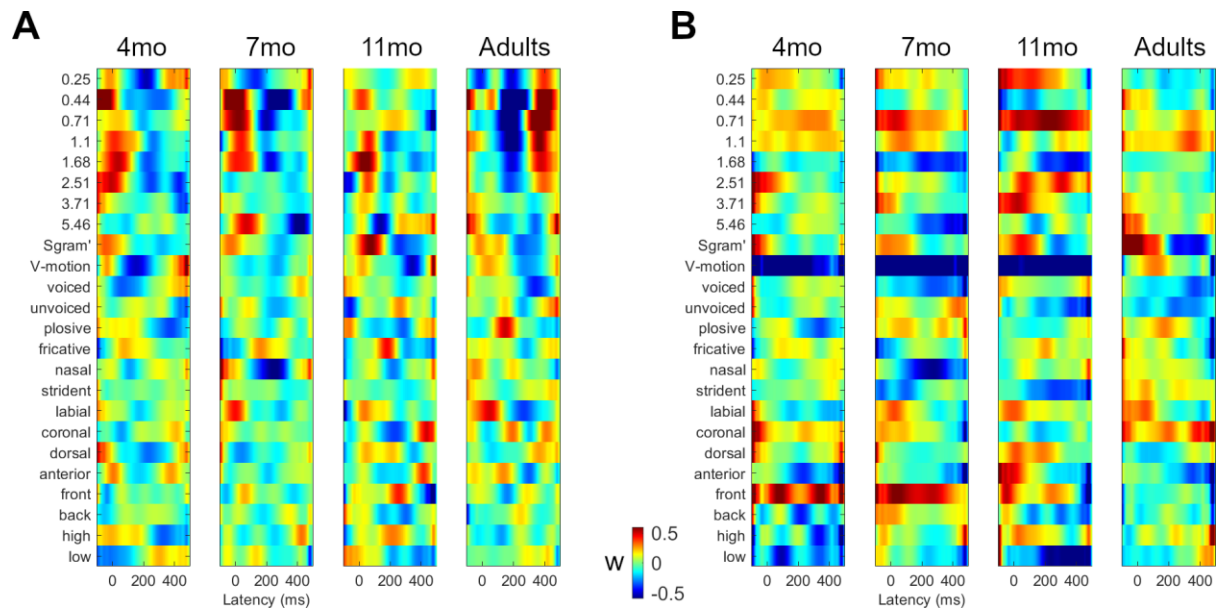

**Supplementary Figure 1:** TRF weights for the acoustic-phonetic model including all features, averaged across all channels, **(A)** in the  $\Delta$ - and  $\Theta$ -band (1-8 Hz) and **(B)** in the 0.1-8 Hz band. Each panel reports the average model weights for the  $n=50$  infant participants and the  $n=17$  adult participants. Colours indicate the value of the regression weights, reported on a symmetrical colour-scale from blue (negative weight) to red (positive weight).

**A**

| <b>S-model</b> |                                                |                                                 |                                                    |
|----------------|------------------------------------------------|-------------------------------------------------|----------------------------------------------------|
|                | <b>low<math>\Delta</math>-band</b>             | <b><math>\Delta</math>-band</b>                 | <b><math>\Theta</math>-band</b>                    |
| <b>4mo</b>     | $p < 0.001$ , $r = 0.63$ , $CI = [0.05, 0.11]$ | $p < 0.001$ , $r = 0.63$ , $CI = [0.03, 0.05]$  | $p = 0.004$ , $r = 0.43$ , $CI = [0.001, 0.003]$   |
| <b>7mo</b>     | $p = 0.002$ , $r = 0.47$ , $CI = [0.01, 0.04]$ | $p = 0.007$ , $r = 0.41$ , $CI = [0.003, 0.02]$ | $p < 0.001$ , $r = 0.58$ , $CI = [0.001, 0.003]$   |
| <b>11mo</b>    | $p = 0.011$ , $r = 0.38$ , $CI = [0.01, 0.04]$ | $p = 0.011$ , $r = 0.38$ , $CI = [0.003, 0.02]$ | $p = 0.054$ , $r = 0.28$ , $CI = [-1.8e-5, 0.003]$ |
| <b>Adults</b>  | $p = 0.017$ , $r = 0.36$ , $CI = [0.01, 0.04]$ | $p = 0.003$ , $r = 0.46$ , $CI = [0.01, 0.05]$  | $p = 0.003$ , $r = 0.45$ , $CI = [0.001, 0.01]$    |

| <b>F-model</b> |                                                 |                                                |                                                    |
|----------------|-------------------------------------------------|------------------------------------------------|----------------------------------------------------|
|                | <b>low<math>\Delta</math>-band</b>              | <b><math>\Delta</math>-band</b>                | <b><math>\Theta</math>-band</b>                    |
| <b>4mo</b>     | $p < 0.001$ , $r = 0.62$ , $CI = [0.02, 0.05]$  | $p = 0.001$ , $r = 0.53$ , $CI = [0.01, 0.02]$ | $p = 0.170$ , $r = 0.20$ , $CI = [-0.3e-4, 0.002]$ |
| <b>7mo</b>     | $p < 0.001$ , $r = 0.59$ , $CI = [0.02, 0.06]$  | $p < 0.001$ , $r = 0.67$ , $CI = [0.02, 0.03]$ | $p < 0.001$ , $r = 0.67$ , $CI = [0.001, 0.003]$   |
| <b>11mo</b>    | $p < 0.001$ , $r = 0.78$ , $CI = [0.02, 0.04]$  | $p < 0.001$ , $r = 0.77$ , $CI = [0.02, 0.04]$ | $p < 0.001$ , $r = 0.63$ , $CI = [0.002, 0.004]$   |
| <b>Adults</b>  | $p = 0.027$ , $r = 0.33$ , $CI = [0.003, 0.05]$ | $p = 0.001$ , $r = 0.52$ , $CI = [0.02, 0.05]$ | $p = 0.001$ , $r = 0.49$ , $CI = [0.004, 0.01]$    |

**B**

| <b>S-model</b>    |                                                   |                                                   |                                                      |
|-------------------|---------------------------------------------------|---------------------------------------------------|------------------------------------------------------|
|                   | <b>low<math>\Delta</math>-band</b>                | <b><math>\Delta</math>-band</b>                   | <b><math>\Theta</math>-band</b>                      |
| <b>4 vs. 11mo</b> | $p = 0.024$ , $r = -0.40$ , $CI = [-0.09, -0.02]$ | $p = 0.025$ , $r = -0.38$ , $CI = [-0.04, -0.01]$ | $p = 0.788$ , $r = -0.06$ , $CI = [-0.002, 0.001]$   |
| <b>4 vs. 7mo</b>  | $p = 0.011$ , $r = -0.47$ , $CI = [-0.08, -0.02]$ | $p = 0.007$ , $r = -0.52$ , $CI = [-0.04, -0.01]$ | $p = 0.721$ , $r = 0.08$ , $CI = [-0.001, 0.002]$    |
| <b>7 vs. 11mo</b> | $p = 0.89$ , $r = 0.03$ , $CI = [-0.02, 0.03]$    | $p = 0.881$ , $r = 0.04$ , $CI = [-0.01, 0.02]$   | $p = 0.472$ , $r = -0.14$ , $CI = [-0.002, 0.71e-4]$ |

| <b>F-model</b>    |                                                  |                                                  |                                                    |
|-------------------|--------------------------------------------------|--------------------------------------------------|----------------------------------------------------|
|                   | <b>low<math>\Delta</math>-band</b>               | <b><math>\Delta</math>-band</b>                  | <b><math>\Theta</math>-band</b>                    |
| <b>4 vs. 11mo</b> | $p = 0.933$ , $r = -0.01$ , $CI = [-0.02, 0.02]$ | $p = 0.011$ , $r = 0.44$ , $CI = [0.01, 0.02]$   | $p = 0.011$ , $r = 0.45$ , $CI = [8.5e-4, 0.004]$  |
| <b>4 vs. 7mo</b>  | $p = 0.393$ , $r = 0.17$ , $CI = [-0.01, 0.03]$  | $p = 0.195$ , $r = 0.25$ , $CI = [-0.002, 0.02]$ | $p = 0.077$ , $r = 0.32$ , $CI = [1.7e-4, 0.003]$  |
| <b>7 vs. 11mo</b> | $p = 0.335$ , $r = -0.19$ , $CI = [-0.03, 0.01]$ | $p = 0.45$ , $r = 0.15$ , $CI = [-0.01, 0.02]$   | $p = 0.355$ , $r = 0.19$ , $CI = [-5.1e-4, 0.003]$ |

**Supplementary Table 1:** Table with the post hoc statistical significance results corresponding to the effect sizes in Figure 1B. **(A)** A post hoc one-sample two-tailed Wilcoxon rank sum test was run to assess if the EEG prediction correlations for each model, group, and frequency-band were greater than zero. The table reports the  $p$ -values of that test after FDR-correction, the effect-size of each test, and the confidence interval before FDR-correction. Note that all results were above chance. **(B)** EEG prediction correlations were compared between groups for each model and frequency-band. The tables report the  $p$ -values of two-tailed Wilcoxon rank sum tests after FDR-correction.
